# Supplementary material for: Strain-tunable CO2 storage by black phosphorene and α-PC from combined first principles and molecular dynamics studies
Source: Royal Society of Chemistry journal article supplement (doi:10.1039/c9cp03676h), 2019-01-01
Supplement: c9cp03676h1.pdf [file c9cp03676h1.pdf]

## Supporting Information

# Strain Tunable CO<sub>2</sub> Storage by Black Phosphorene and $\alpha$ -PC from Combined First-principle and Molecular Dynamics Study

Xiaohan Song<sup>1†</sup>, Yang Liu<sup>1†</sup>, Yanmei Yang<sup>2</sup>, Weifeng Li<sup>1\*</sup> and Mingwen Zhao<sup>1\*</sup>

1. School of Physics and State Key Laboratory of Crystal Materials, Shandong University, Jinan, Shandong, 250100, China

2. College of Chemistry, Chemical Engineering and Materials Science, Collaborative Innovation Center of Functionalized Probes for Chemical Imaging in Universities of Shandong, Key Laboratory of Molecular and Nano Probes, Ministry of Education, Institute of Molecular and Nano Science, Shandong Normal University, Jinan, 250014, China

† These authors contribute equally.

\* Corresponding authors. Email: [lwf@sdu.edu.cn](mailto:lwf@sdu.edu.cn) (W. Li) and [zmw@sdu.edu](mailto:zmw@sdu.edu) (M. Zhao)

## 1. Force Field Parameters in MD Simulations

In our simulations, the classical force field parameters for CO<sub>2</sub> molecules were adopted from Sandler's work which is parameterized to reproduce the experimental vapor-liquid equilibrium data.<sup>1</sup> Following the method of Aluru group,<sup>2</sup> the phosphorus and carbon atoms in BP and  $\alpha$ -PC are described as Lennard-Jones particles. The carbon atoms in  $\alpha$ -PC are assigned atom type "CA" in the OPLS force field with the cross section of 0.355 nm and well depth of 0.29288 kJ/mol. The phosphorus atoms in both BP and  $\alpha$ -PC are optimized to reproduce the CO<sub>2</sub> adsorption energy profiles obtained from high-level quantum mechanics (QM) calculations, which are 0.377 nm (cross section) and 1.0251 kJ/mol (well-depth).

## 2. Energy Profiles of a CO<sub>2</sub> Molecule Adsorption on BP and $\alpha$ -PC Surface

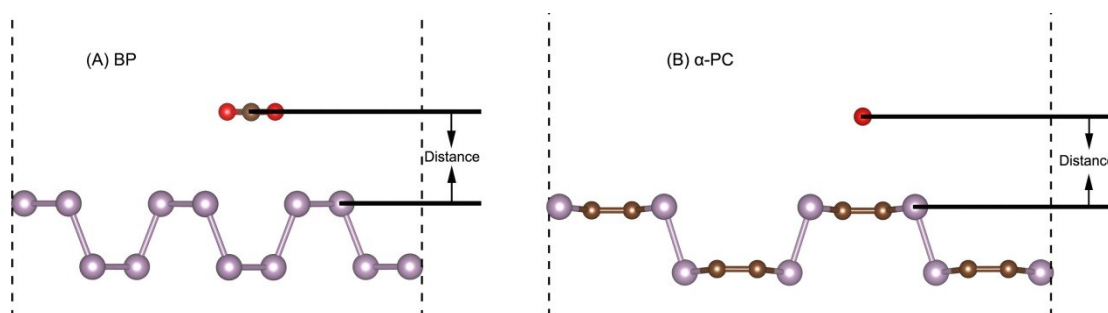

Figure s1. Illustrations of the adsorption process of a CO<sub>2</sub> molecule binding on (A) BP and (B)  $\alpha$ -PC Surface.

The above parameters are optimized by reproducing the energy profiles of a CO<sub>2</sub> molecule adsorption on BP and  $\alpha$ -PC Surface. Fig. s1 depicts two structure models. Using the force field parameters, the adsorption energy profiles from QM calculations are well reproduced as shown in Fig. s2.

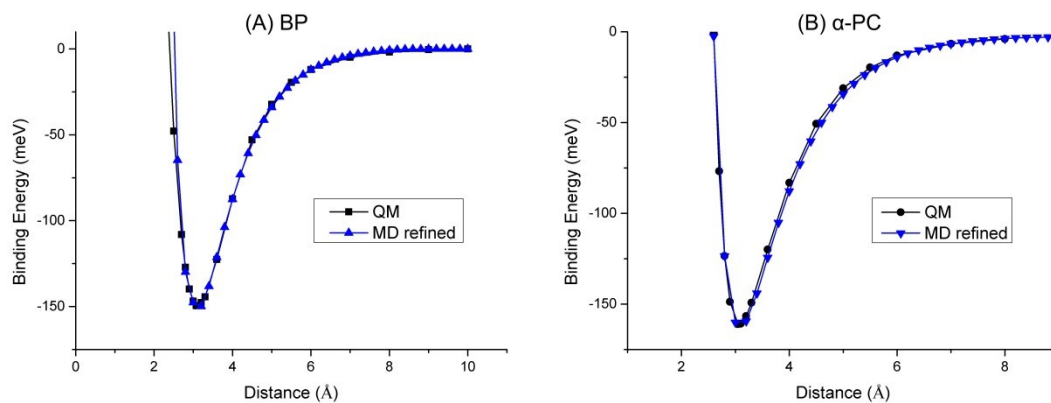

Figure s2. The energy profiles of a CO<sub>2</sub> molecule adsorption on (A) BP and (B)  $\alpha$ -PC surface from quantum mechanics (QM) calculations and MD simulations with the optimized parameters.

**Reference:**

1. R. Babarao, Z. Hu, J. Jiang, S. Chempath and S. I. Sandler, *Langmuir*, 2007, **23**, 659-666.
2. C. Y. Won and N. R. Aluru, *Journal of the American Chemical Society*, 2007, **129**, 2748-+.
